# Supplementary material for: Assessment of Nutritional Status in Critically Ill Patients Using the Malnutrition Universal Screening Tool—MUST
Source: Preprints.org preprint supplement (doi:10.20944/preprints202312.1418.v1), 2023-12-19
Supplement: Supplementary file 1 [file supplementary]

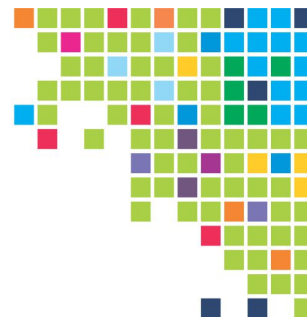

**UNIVERSIDAD SANTIAGO DE CALI  
COMITÉ CIENTÍFICO DE ÉTICA Y BIOÉTICA – “CEB-USC”  
FACULTAD DE SALUD**

Santiago de Cali, 26 de junio del 2020

**Doctor(a):** BLANCA CECILIA DÍAZ CHAVARRO, GUILHERMO MOLINA RECIO, MANUEL ROMERO SALDAÑA, JORGE KARIM ASSIS REVEIZ.

**Docentes del Programa de Enfermería Cali**

**E. S. M.**

Asunto: **Aval** para el **anteproyecto de investigación** titulado: IMPACTO DE UNA INTERVENCIÓN NUTRICIONAL EN PACIENTES ESTADO CRÍTICO

El comité Científico de Ética y Bioética de la Universidad Santiago de Cali – “CEB-USC” - Facultad de Salud en la sesión 26 de junio del 2020, según Acta N° 01, en uso de sus funciones para las cuales fue creado, resuelve:

**OTORGAR EL AVAL DESDE EL PUNTO DE VISTA ÉTICO Y BIOÉTICO**, al proyecto en mención, con la (s) siguiente (s) recomendación (es):

- El equipo investigador del comité de ética y Bioética de la Facultad de salud, en pleno uso de sus funciones, aceptado por el consejo académico de la Universidad Santiago de Cali, encuentra alguna(s) situación(es) inconsistente(s) que puede(n) afectar, o alterar el objeto de estudio, por lo cual es responsabilidad del director, investigador o estudiantes en hacer las correcciones.
- Se solicita tener en cuenta las observaciones y sugerencias anotadas en el formato de evaluación del cual se anexa, así como en el trabajo propiamente.
- A partir de las correcciones realizadas, podrán continuar con el trabajo de campo.

Si durante el desarrollo del proyecto de Investigación, el equipo investigador encuentra alguna(s) situación(es) anormal(es) que pueda(n) perjudicar, o alterar el objeto involucrado en el estudio, o existe algún cambio de objetivos, título, u otro aspecto relevante, se debe informar de inmediato a este comité, ya que cualquier hallazgo en este sentido, puede variar el curso de la investigación, de lo cual este comité se encuentra exento de responsabilidad.

Atentamente,



**DANIEL SEPULVEDA**  
Presidente del Comité de Ética



**LUZ ELENA URIBE DE O**  
Secretaria del Comité de Ética

CC: Archivo del CEB-USC-Facultad de Salud
